# Supplementary material for: Functional Network Analysis Reveals the Relevance of SKIIP in the Regulation of Alternative Splicing by p38 SAPK
Source: PubMed Central journal article supplement — Cell Rep. 2019 Apr 16;27(3):847–859.e6. doi: 10.1016/j.celrep.2019.03.060 (PMC6484779; doi:10.1016/j.celrep.2019.03.060), 2019-04-16
Supplement: mmc1.pdf [file mmc1.pdf]

**Cell Reports, Volume 27**

## **Supplemental Information**

### **Functional Network Analysis Reveals the Relevance of SKIIP in the Regulation of Alternative Splicing by p38 SAPK**

**Caterina Carbonell, Arnau Ulsamer, Claudia Vivori, Panagiotis Papasaikas, René Böttcher, Manel Joaquín, Belén Miñana, Juan Ramón Tejedor, Eulàlia de Nadal, Juan Valcárcel, and Francesc Posas**

**A**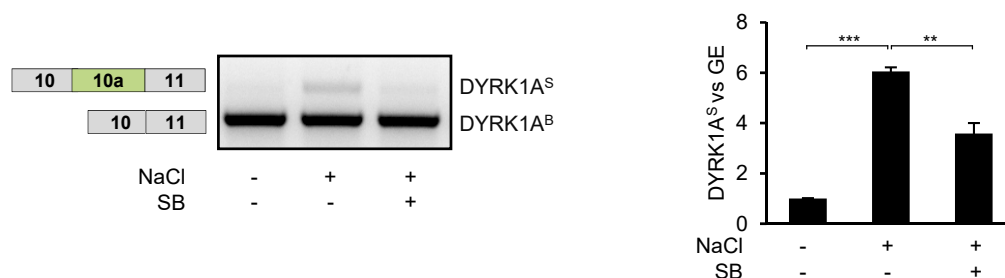**B**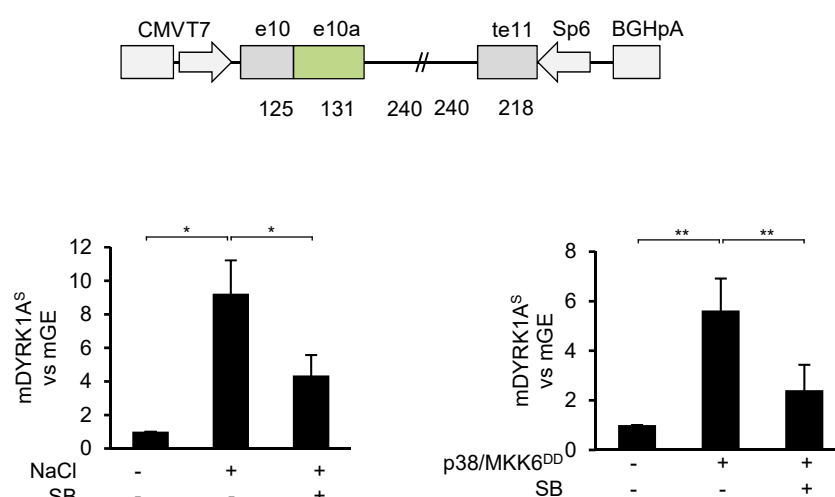

**Figure S1. p38 SAPK modulates DYRK1A endogenous and minigene AS.** Related to Table S1 and STAR methods. **(A)** Validation of AS event in DYRK1A (11.6.2) depicted with a schematic diagram, showing constitutive exons 10 and 11 (grey boxes) and alternative exon 10a (green box). HeLa cells were untreated, treated for 2 hours with 100 mM NaCl or pre-treated for 30 minutes with SB203580 prior to NaCl treatment. Changes in DYRK1A AS were assessed by RT-PCR using primers flanking constitutive exons (left panel). Levels of stress-induced isoforms (S) and total gene expression (GE) were determined by qPCR using primers targeting exon-junctions and constitutive exons, respectively (right panel). **(B)** Schematic diagram of the DYRK1A minigene used is shown. For analysis of the DYRK1A 5'ss event, the region from exon 10 to 220 bp upstream of the 3'ss of exon 11 was cloned, including a 5-kb deletion of intron 10. The length (bp) of the exons and introns included in the minigene is indicated under the diagram. Left panel: HeLa cells transiently transfected with DYRK1A minigene construct were treated as in (A). Right panel: HeLa cells were transiently transfected with DYRK1A minigene, p38 and MKK6<sup>DD</sup> and incubated (or not) with SB203580 for 24 hours. Minigene (m) AS isoforms and total minigene expression (mGE) were assessed by qPCR and normalized to non-treated cells, which were assigned a value of 1. Data are shown as means  $\pm$ SD from at least three biological replicates. Significant changes were calculated by Student's t-test.

Figure S2

**A**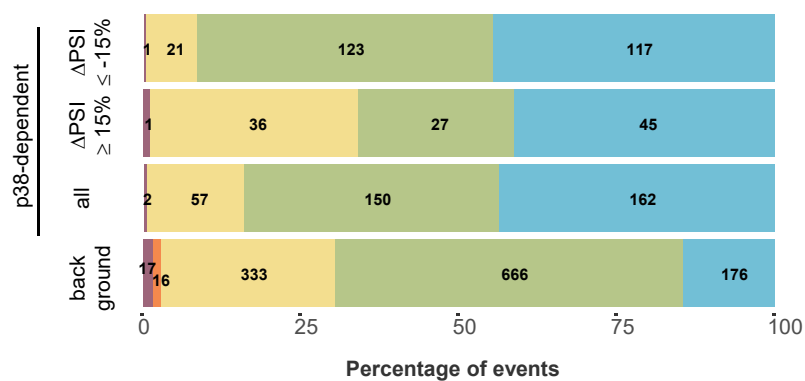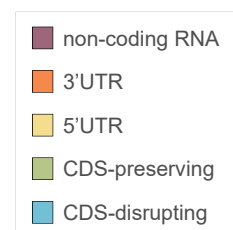**B**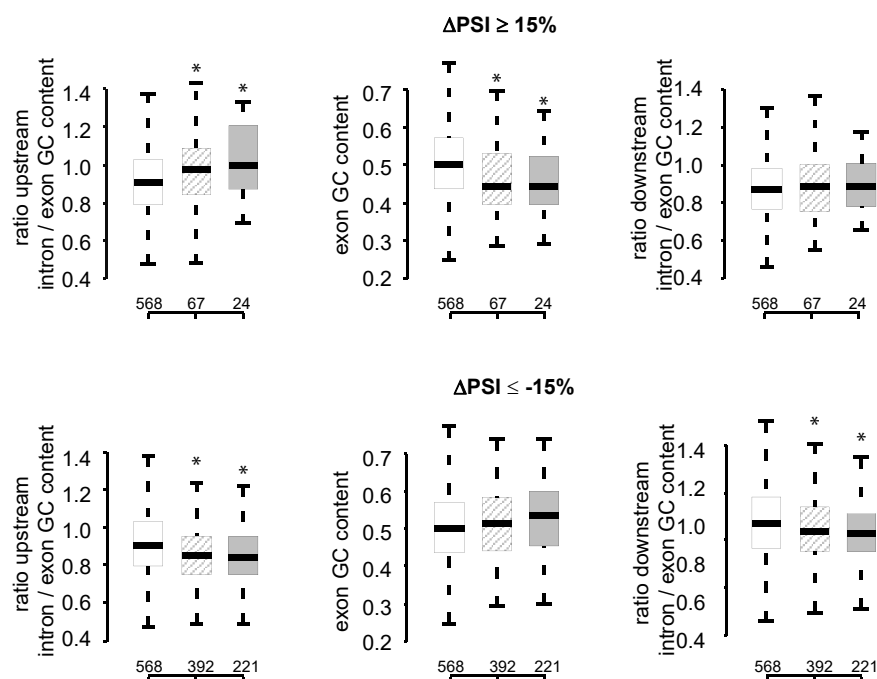**C**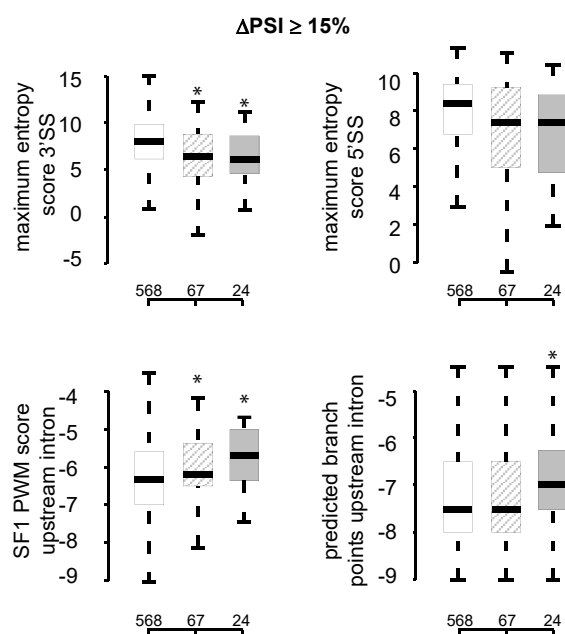**D**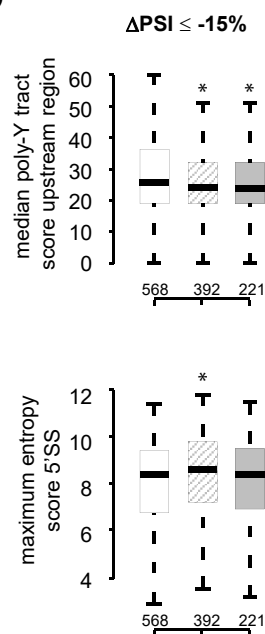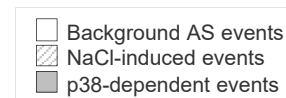

**Figure S2. NaCl-induced and p38-dependent exons feature distinct intronic and exonic GC content and weaker splice sites.** Related to Figure 1 and Table S2. **(A)** Proportion of events disrupting the transcript open reading frame (CDS-disrupting), preserving it (CDS-preserving), mapping in 3'/5' untranslated regions (UTR) or in non-coding RNA. Numbers of events are shown for each category: background alternative events, p38-dependent events (ALL) and subsets of p38-dependent events with  $\Delta\text{PSI} \geq 15$  or  $\Delta\text{PSI} \leq -15$ . **(B)** Exonic GC content and ratio intronic / exonic GC content in NaCl-induced and p38-dependent exons compared to background. Top and bottom panels represent exons included and skipped upon NaCl treatment, respectively. **(C-D)** Splice site strength and branch point features in NaCl-induced and p38-dependent included (C) or skipped (D) exons after osmostress compared to background alternative exons. Boxplots corresponding to each feature represent the inter-quantile range (IQR) with median values shown by the black line. Outliers were discarded. Significant changes were calculated by Mann-Whitney-Wilcoxon test comparing each set of exons vs. the background set (\* $p < 0.05$ ).

**A**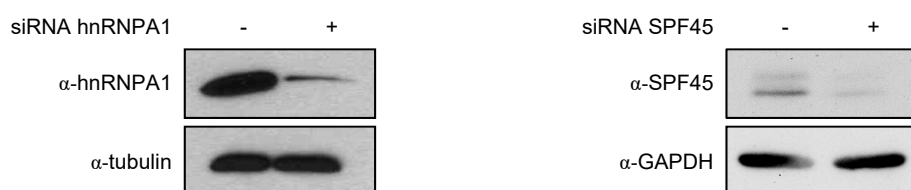**B**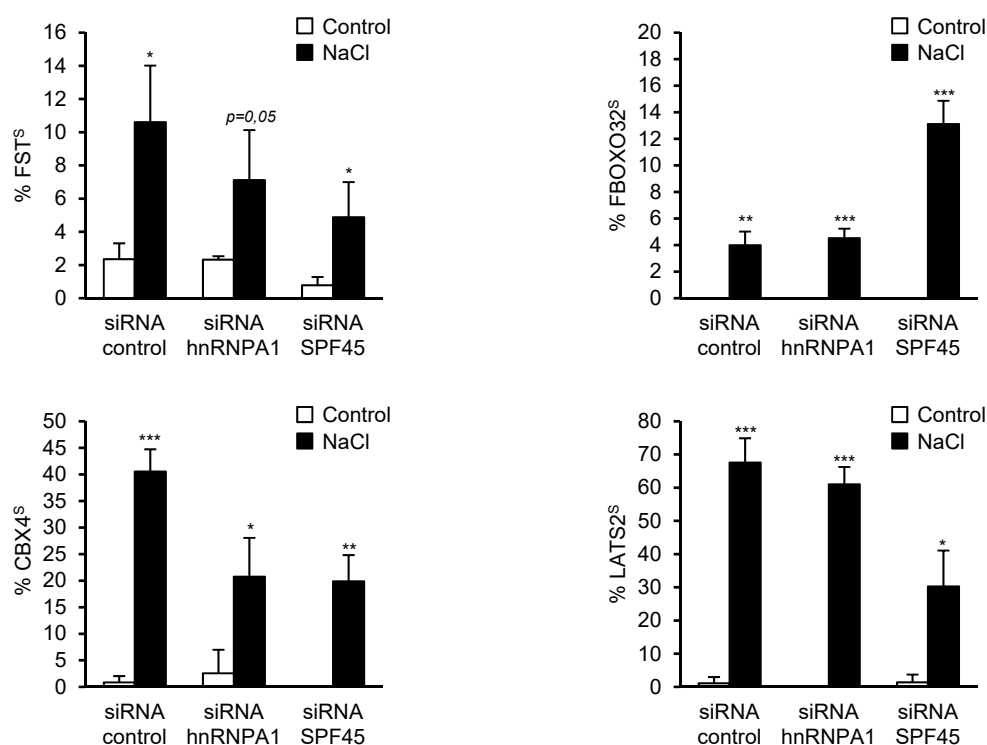

**Figure S3. Depletion of hnRNPA1 or SPF45 does not prevent significant changes in p38-dependent events upon stress.** Related to Figure 3. **(A)** Western blot analysis of HeLa cells expressing control, hnRNPA1 or SPF45 siRNAs. **(B)** siRNA-treated HeLa cells were stimulated or not for 3 hours with 100 mM NaCl. AS patterns were analyzed by RT-PCR as in Figure 1.

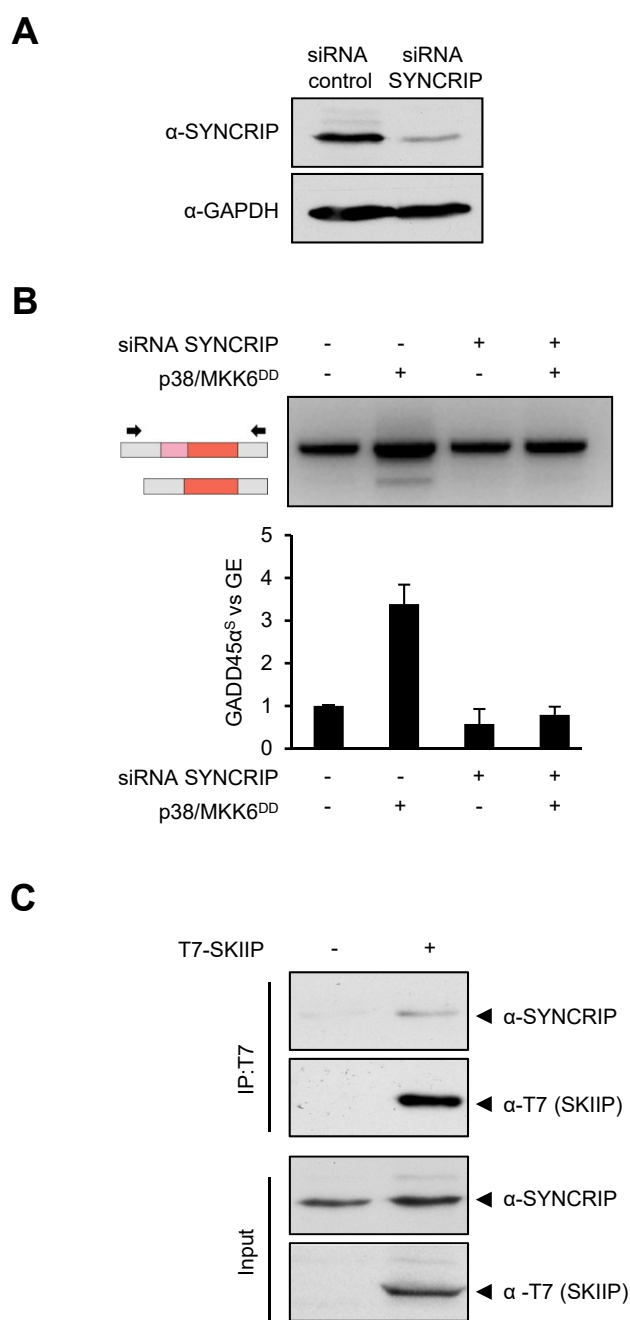

**Figure S4. SYNCRIP is essential for p38-dependent GADD45α<sup>S</sup> induction.** Related to Figure 3. **(A)** Western blot analysis of HeLa cells expressing control or SYNCRIP siRNA is shown. **(B)** SYNCRIP is essential for p38-dependent GADD45α<sup>S</sup> induction. HeLa cells were treated with scrambled or SYNCRIP stealth siRNA and treated for 2 hours with 100 mM NaCl. Changes in GADD45α AS were assessed by RT-PCR using the primers indicated by arrows (upper panel). Levels of stress-induced isoforms (S) and total gene expression (GE) of GADD45α were determined by qPCR using primers targeting exon-junctions and constitutive exons, respectively (lower panel). Relative expression of stress isoforms was quantified as fold change over non-treated cells. **(C)** SYNCRIP interacts with SKIIP *in vivo*. T7-SYNCRIP was expressed in HeLa cells, immunoprecipitated with anti-T7 coupled Sepharose beads and analyzed by Western blotting with anti-T7 and anti-SYNCRIP antibodies.

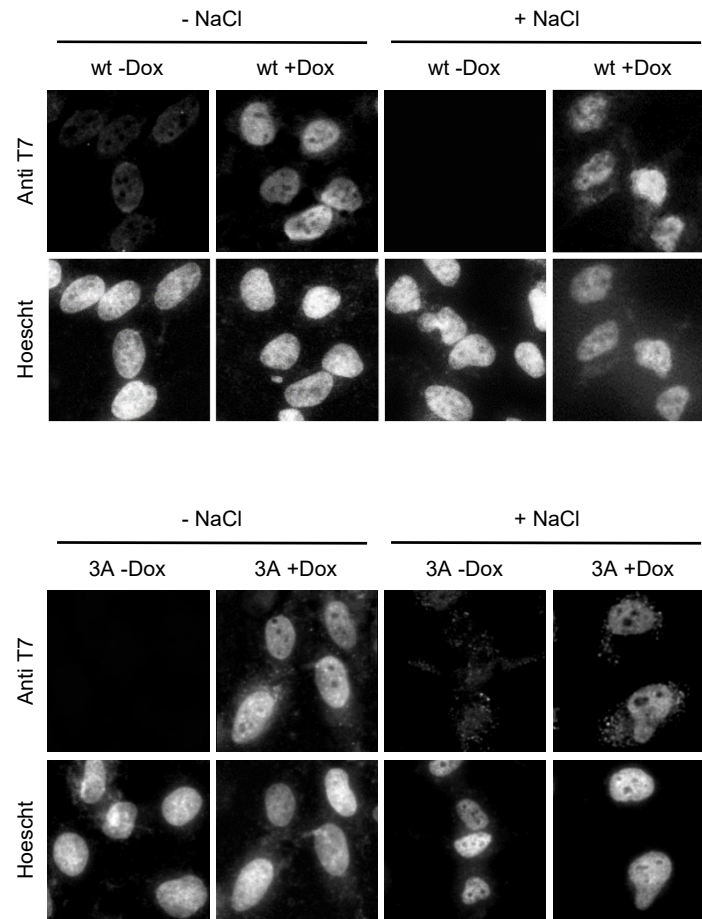

**Figure S5. SKIIP nuclear localization is not affected in response to osmostress or by its phosphorylation by p38.** Related to Figure 5. HeLa cells stably expressing doxycycline-inducible T7-SKIIP and T7-SKIIP 3A proteins were grown in 8-chamber glass slides. The expression of T7-epitope tagged SKIIP and SKIIP 3A was induced (+Dox) or not (-Dox) upon the addition of doxycyclin (12.5  $\mu$ g/ml for 24 hours) and cells were stressed (100 mM NaCl for 1 hour). Images of the immunocytochemistry with anti T7 antibody in the presence of Hoechst 33342 to stain the nuclei are shown.

Table S1

| EventID      | Gene name | Type of event            |
|--------------|-----------|--------------------------|
| 00312.0003.1 | BUB1B     | novel_exons              |
| 00058.0052.1 | CD44      | exon(s)skipped           |
| 00058.0007.4 | CD44      | exon(s)skipped           |
| 00246.0016.1 | SPTAN1    | alt_splice_acceptor      |
| 00351.0008.1 | MAP2K1    | exon(s)skipped           |
| 274:1_5:1    | FN1       | novel_exons              |
| 165:1_5:33   | CROP      | Mutually-Exclusive-Exons |
| 11.6.2       | DYRK1A    | novel_exons              |
| 116:1_4:1    | CDC40     | novel_exons              |
| 00111.0016.1 | FOS       | exon(s)skipped           |

**Table S1.** List of AS events osmostress- and SB203580- dependent (custom splicing-sensitive microarray platform). Related to STAR methods.
